# Supplementary material for: Switch rates, time-to-switch, and switch patterns of antiretroviral therapy in people living with human immunodeficiency virus in Japan, in a hospital-claim database
Source: PubMed Central journal article supplement (PMC6558763; doi:10.1186/s12879-019-4129-6), 2019-06-10
Supplement: 12879_2019_4129_MOESM1_ESM.pdf [file 12879_2019_4129_MOESM1_ESM.pdf]

Additional file 1. Type of backbone classified as others in the prescription of the first ART regimen (n = 118)

| Backbone(s)     | Anchor drug class prescribed in the first ART regimen |                   |                 |                   |
|-----------------|-------------------------------------------------------|-------------------|-----------------|-------------------|
|                 | Overall                                               | NNRTI<br>(n = 85) | PI<br>(n = 162) | INSTI<br>(n = 22) |
| AZT             | 1 (0.8)                                               | 0 (0.0)           | 0 (0.0)         | 1 (7.1)           |
| 3TC             | 3 (2.5)                                               | 2 (5.3)           | 1 (1.5)         | 0 (0.0)           |
| d4T             | 1 (0.8)                                               | 0 (0.0)           | 1 (1.5)         | 0 (0.0)           |
| AZT/3TC         | 44 (37.3)                                             | 16 (42.1)         | 23 (35.4)       | 5 (35.7)          |
| 3TC and AZT     | 43 (36.4)                                             | 11 (28.9)         | 30 (46.2)       | 2 (14.3)          |
| 3TC and d4T     | 17 (14.4)                                             | 7 (18.4)          | 9 (13.8)        | 1 (7.1)           |
| ABC and TDF/FTC | 1 (0.8)                                               | 1 (2.6)           | 0 (0.0)         | 0 (0.0)           |
| ddl and d4T     | 1 (0.8)                                               | 1 (2.6)           | 0 (0.0)         | 0 (0.0)           |
| No backbone     | 7 (5.9)*                                              | 0 (0.0)           | 1 (1.5)         | 5 (35.7)          |

ART: antiretroviral therapy, NNRTI: non-nucleoside reverse transcriptase inhibitor, PI: protease inhibitor, INSTI: integrase strand transfer inhibitor, AZT: zidovudine, 3TC: lamivudine, d4T: 2',3'-didehydro-3'-deoxythymidine, ABC: abacavir, TDF: tenofovir disoproxil fumarate, FTC: emtricitabine, ddl: didanosine

\*One patient prescribed an entry inhibitor was included.
